# Supplementary material for: Rapid HPLC-ESI-MS/MS Analysis of Neurotransmitters in the Brain Tissue of Alzheimer’s Disease Rats before and after Oral Administration of Xanthoceras sorbifolia Bunge
Source: MDPI journal article supplement (doi:10.3390/molecules23123111), 2018-11-28
Supplement: s1 [file s1]

## Supplementary Material

# Rapid analysis of neurotransmitters in the brain tissue of Alzheimer's disease rats before and after oral administration of *Xanthoceras sorbifolia* Bunge by HPLC-ESI-MS/MS

Zheng Sun<sup>1</sup>, Qing Li<sup>1</sup> and Kaishun Bi<sup>1,\*</sup>

<sup>1</sup> National and Local Joint Engineering Laboratory for Key Technology of Chinese Material Medica Quality Control, School of Pharmacy, Shenyang Pharmaceutical University, 103 Wenhua Rd.,  
Shenyang 110016, China; [sunzheng024@163.com](mailto:sunzheng024@163.com) (Z.S.); [lqyxm@hotmail.com](mailto:lqyxm@hotmail.com) (Q.L.)

\* Correspondence: [kaishunbi.syphu@gmail.com](mailto:kaishunbi.syphu@gmail.com); Tel.: +86-24-4352-0589

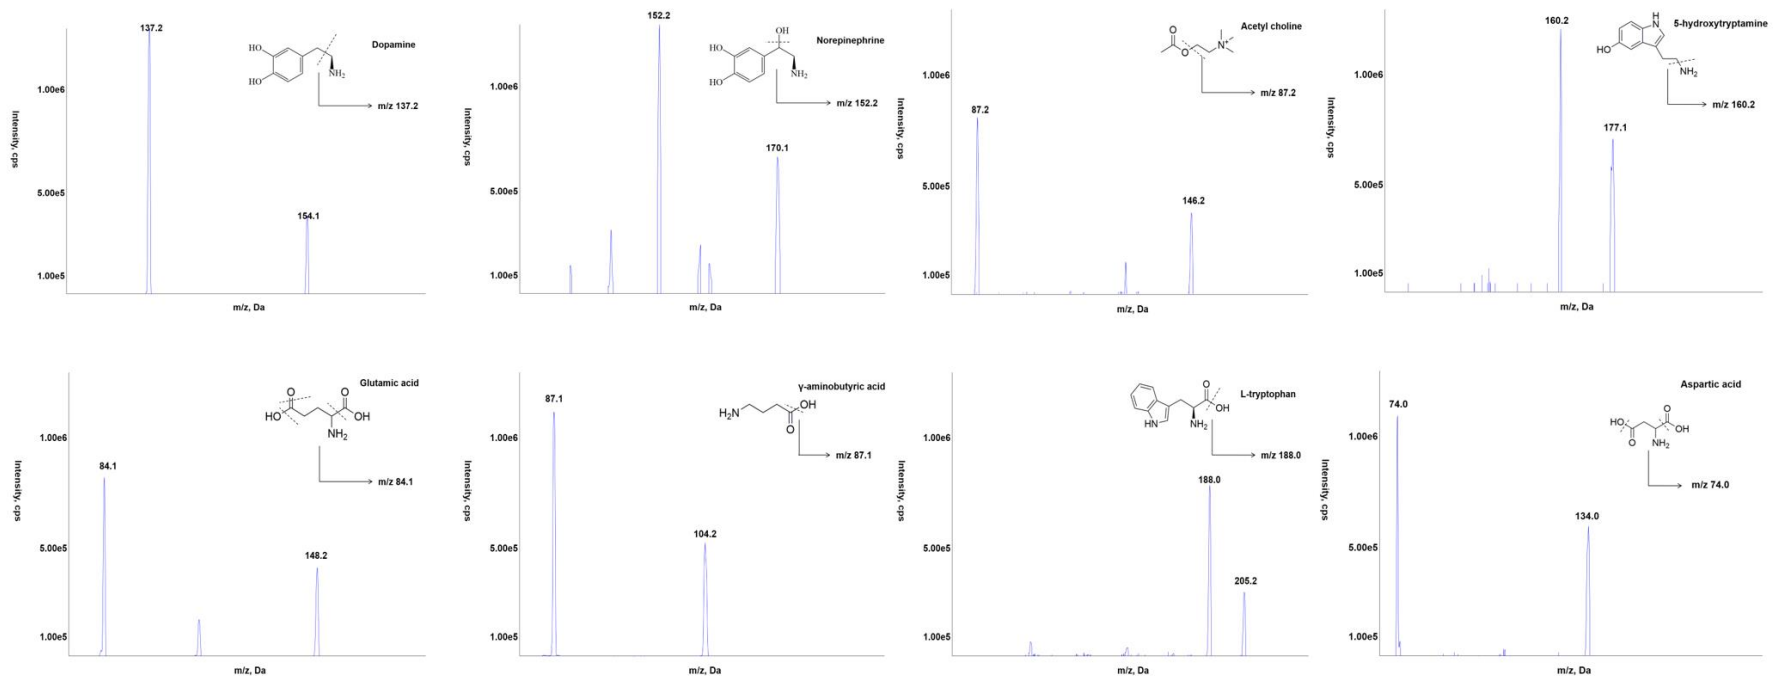

Supplementary Figure 1 Chemical structures and full scan of product ion spectrums from Dopamine, Norepinephrine, Acetyl choline, 5-hydroxytryptamine, Glutamic acid,  $\gamma$ -aminobutyric acid, L-tryptophan and Aspartic acid.

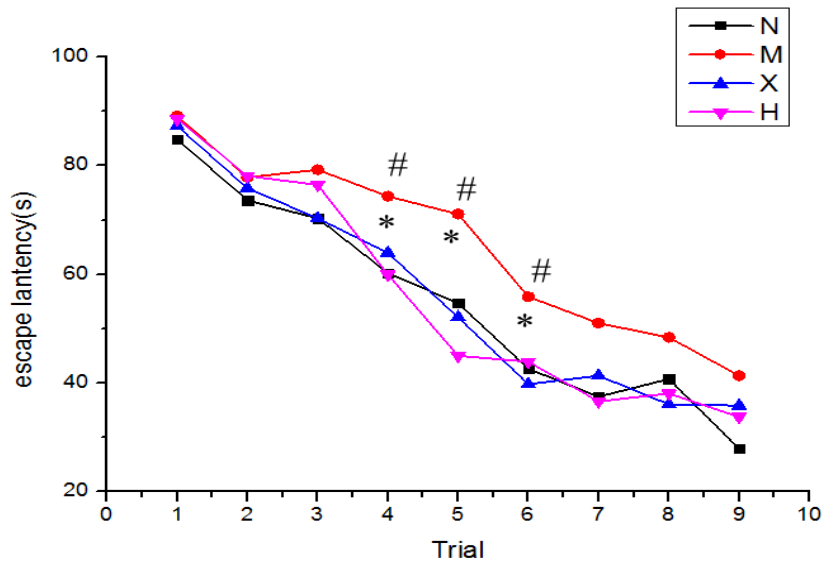

Supplementary Figure 2 Effect of *Xanthoceras sorbifolia* Bunge on escape latency in rats with AD in the directional swimming test of 5 days.

N: control group; M: model group; X: *Xanthoceras sorbifolia* Bunge group; H: huperzine group.

#p < 0.05, compared with N group; \*p < 0.05, compared with X group.

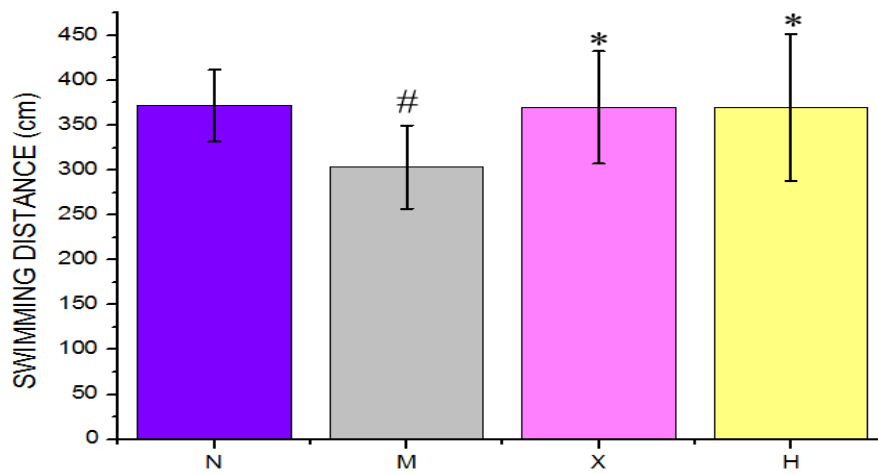

Supplementary Figure 3 The effect of *Xanthoceras sorbifolia* Bunge on the swimming distance in the target quadrant in model rats in probe test.

N: control group; M: model group; X: *Xanthoceras sorbifolia* Bunge group; H: huperzine group.

#p < 0.05 compared with control group; \*p < 0.05, compared with model group.

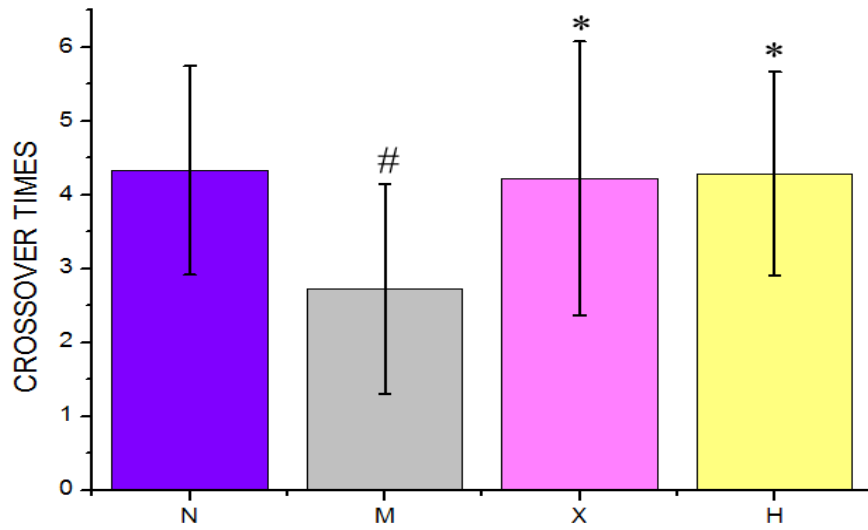

Supplementary Figure 4 The effect of *Xanthoceras sorbifolia* Bunge on the number of across the platform in model rats in probe test.

N: control group; M: model group; X: *Xanthoceras sorbifolia* Bunge group; H: huperzine group.

# $p < 0.05$  compared with control group; \* $p < 0.05$ , compared with model group.
